# Supplementary material for: Halorhabdus tiamatea: proteogenomics and glycosidase activity measurements identify the first cultivated euryarchaeon from a deep-sea anoxic brine lake as potential polysaccharide degrader
Source: PubMed Central journal article supplement — Environ Microbiol. 2014 Feb 27;16(8):2525–37. doi: 10.1111/1462-2920.12393 (PMC4257568; doi:10.1111/1462-2920.12393), 2014-02-27
Supplement: emi0016-2525-SD2.pdf [file emi0016-2525-SD2.pdf]

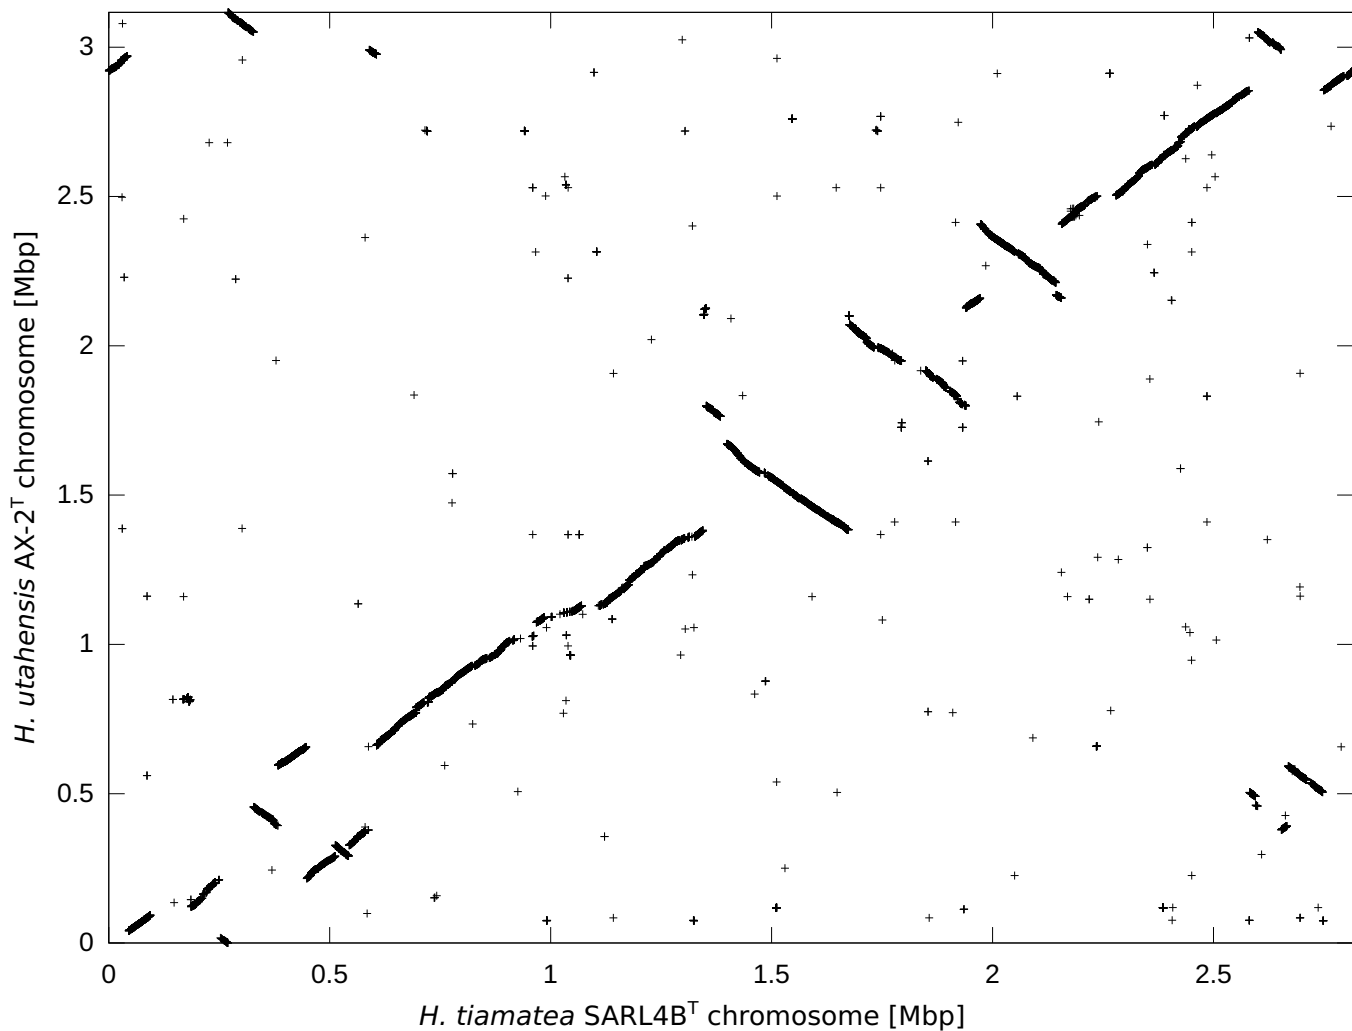

**Fig. S1.** Whole genome alignment between *H. utahensis* and *H. tiamatea*. The genome of *H. tiamatea* was split into 50 bp fragments and subsequently mapped on the *H. utahensis* with SSAHA2 v. 2.5 (Ning *et al.*, 2001).
